# Supplementary material for: Prediction of insulin resistance and non-alcoholic fatty liver disease using serum uric acid and related markers in children and adolescents
Source: Research Square preprint supplement (doi:10.21203/rs.3.rs-3890639/v1), 2024-04-10
Supplement: Supplementary file 1 [file 3dbf1a363af70616bbd462f5.docx]

**Supplementary Table S1 - Comparison of areas under receiver operating curves among each parameter for predicting IR and NAFLD**

|  | IR | | | | | | | | | | | | | | |
| --- | --- | --- | --- | --- | --- | --- | --- | --- | --- | --- | --- | --- | --- | --- | --- |
| Variables | Uacid, mg/dL | | Uacid/Cr | | Uacid/HDL | | Uacid-BMI | | | Uacid  -BMI SDS | | Uacid-WC | | Uacid-WHtR | |
| Uacid, mg/dL | reference | | 0.135 | | <0.001 | | <0.001 | | | <0.001 | | <0.001 | | <0.001 | |
| Uacid/Cr | 0.135 | | reference | | 0.175 | | <0.001 | | | <0.001 | | 0.001 | | <0.001 | |
| Uacid/HDL | <0.001 | | 0.175 | | reference | | <0.001 | | | <0.001 | | <0.001 | | <0.001 | |
| Uacid-BMI | <0.001 | | <0.001 | | <0.001 | | reference | | | <0.001 | | <0.001 | | 0.946 | |
| Uacid-BMI SDS | <0.001 | | <0.001 | | <0.001 | | <0.001 | | | reference | | <0.001 | | <0.001 | |
| Uacid-WC | <0.001 | | 0.001 | | <0.001 | | <0.001 | | | <0.001 | | reference | | <0.001 | |
| Uacid-WHtR | <0.001 | | <0.001 | | <0.001 | | 0.946 | | | <0.001 | | <0.001 | | reference | |
|  | NAFLD | | | | | | | | | | | | | | |
| Variables | Uacid, mg/dL | Uacid/Cr | | Uacid/HDL | | Uacid-BMI | | Uacid  -BMI SDS | Uacid-WC | | Uacid-WHtR | | Insulin, μIU/mL | | HOMA-IR |
| Uacid, mg/dL | reference | <0.001 | | 0.454 | | <0.001 | | 0.001 | <0.001 | | <0.001 | | 0.861 | | 0.988 |
| Uacid/Cr | <0.001 | Reference | | <0.001 | | <0.001 | | <0.001 | <0.001 | | <0.001 | | 0.003 | | 0.005 |
| Uacid/HDL | 0.454 | <0.001 | | reference | | <0.001 | | 0.003 | <0.001 | | <0.001 | | 0.904 | | 0.782 |
| Uacid-BMI | <0.001 | <0.001 | | <0.001 | | reference | | 0.818 | 0.634 | | 0.050 | | 0.011 | | 0.007 |
| Uacid-BMI SDS | 0.001 | <0.001 | | 0.003 | | 0.818 | | reference | 0.936 | | 0.388 | | 0.020 | | 0.014 |
| Uacid-WC | <0.001 | <0.001 | | <0.001 | | 0.634 | | 0.936 | reference | | 0.009 | | 0.012 | | 0.008 |
| Uacid-WHtR | <0.001 | <0.001 | | <0.001 | | 0.050 | | 0.388 | 0.009 | | reference | | 0.003 | | 0.002 |
| Insulin, μIU/mL | 0.861 | 0.003 | | 0.904 | | 0.011 | | 0.020 | 0.012 | | 0.003 | | Reference | | 0.066 |
| HOMA-IR | 0.988 | 0.005 | | 0.782 | | 0.007 | | 0.014 | 0.008 | | 0.002 | | 0.066 | | reference |

Note: Bootstrap method was used to perform pairwise comparisons between AUCs for the parameters. Values are presented as *p* values.

Abbreviations: *IR,* insulin resistance; *NAFLD*, non-alcoholic fatty liver disease; *Uacid*, uric acid; *Cr,* creatinine; *BMI,* body mass index; *WC,* waist circumference; *WHtR,* waist-to-height ratio; *HOMA-IR,* homeostasis model assessment of insulin resistance.
